# Supplementary material for: Effects of Morphology and Solvent/Temperature on THz Spectra: Take Nucleosides as Example
Source: Molecules. 2023 Feb 4;28(4):1528. doi: 10.3390/molecules28041528 (PMC9965851; doi:10.3390/molecules28041528)
Supplement: Supplementary file 1 [file molecules-28-01528-s001.zip › molecules-2169109-supplementary.pdf]

## **Effects of morphology and solvent / temperature on THz spectra: take nucleosides as example**

Fang Wang<sup>1</sup>, Haifeng Lin<sup>2\*</sup>, Jiawen Tong<sup>1</sup>, Junbin Tai<sup>1</sup>, Jiaen Wu<sup>1</sup>, Yaru Yao<sup>1</sup>, Yunfei Liu<sup>2</sup>

<sup>1</sup>College of Electronic Engineering, Nanjing Xiaozhuang University, Nanjing 211171, China

<sup>2</sup>College of Information Science and Technology, Nanjing Forestry University, Nanjing 210037, China

\*Correspondence: haifeng.lin@njfu.edu.cn

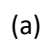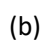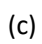

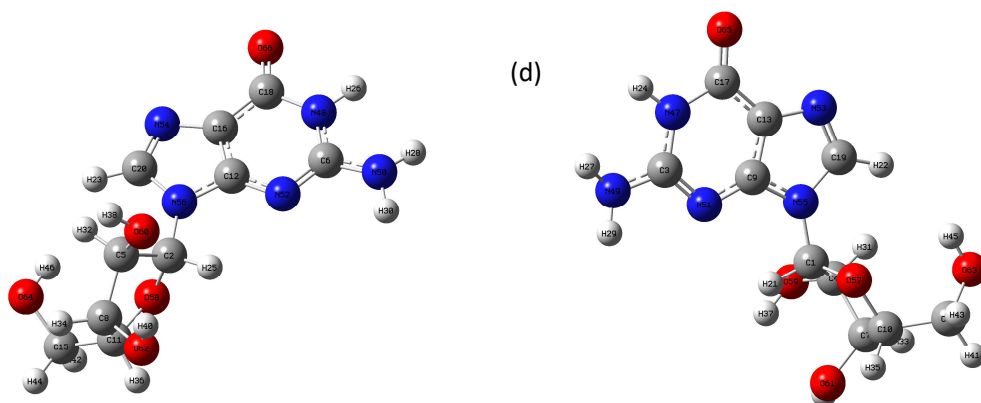

**Figure S1.** The structure of (a) Guanosine-dimer-2H2O before optimization, (b) and the structure of Guanosine-dimer-2H2O, (c) Guanosine-dimer, (d) Guanosine-dimer-water after optimization.

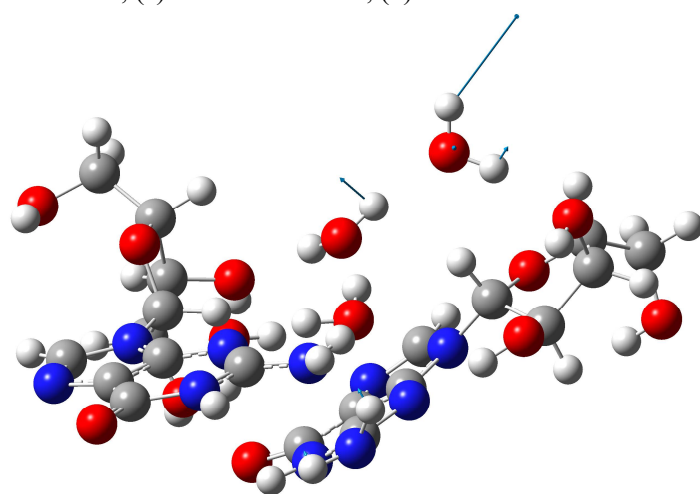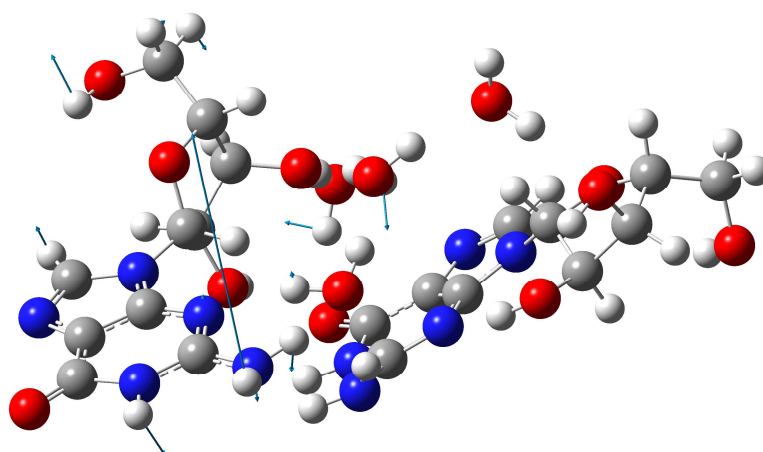

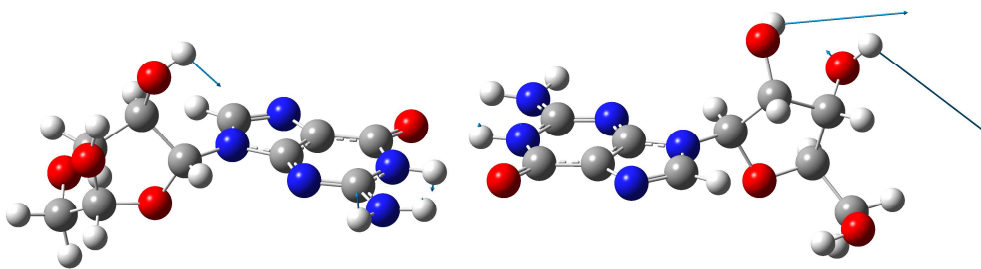

5.5 THz (Guanosine-dimer)

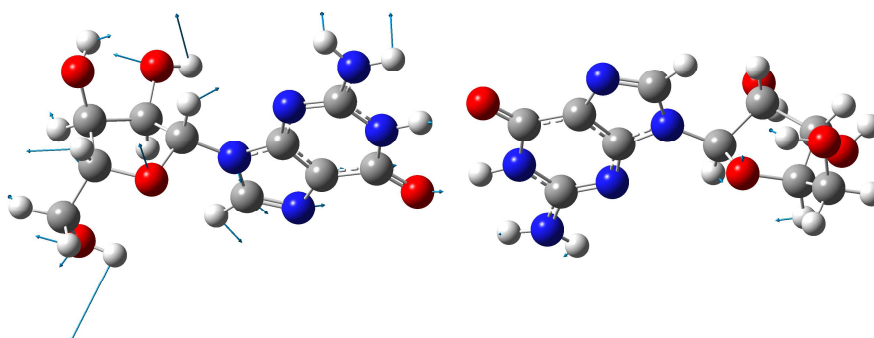

7.1 THz (Guanosine-dimer)

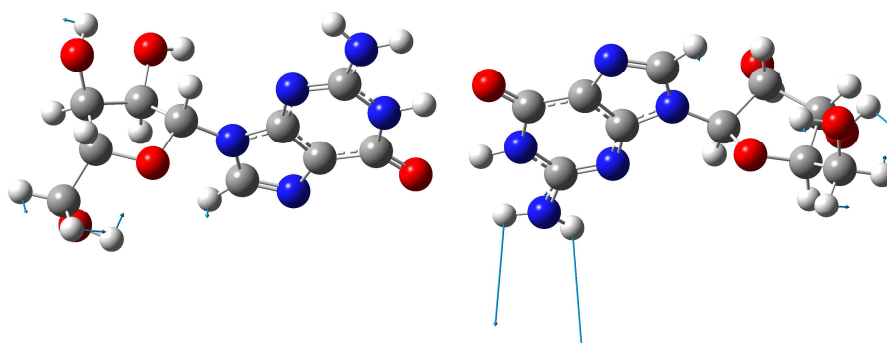

8.7 THz (Guanosine-dimer)

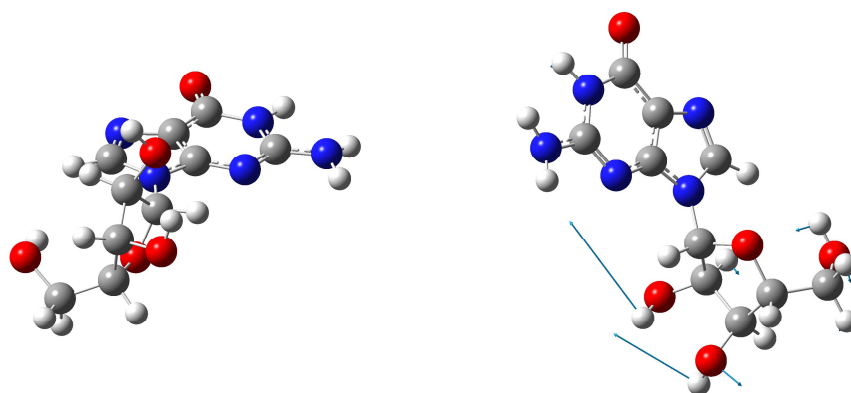

6.2 THz (Guanosine-dimer-water)

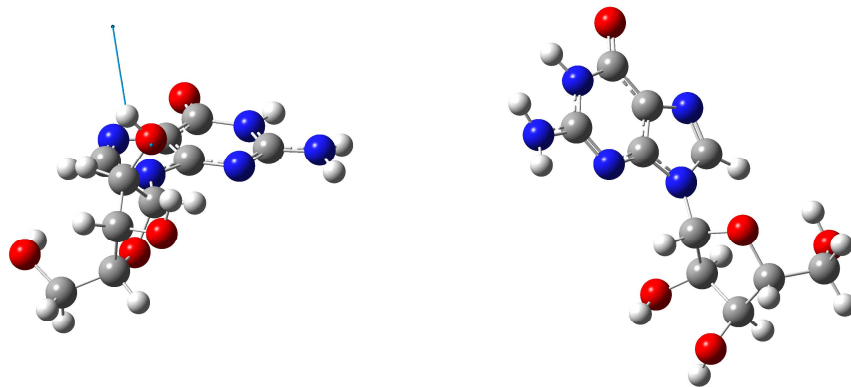

7.2 THz (Guanosine-dimer-water)

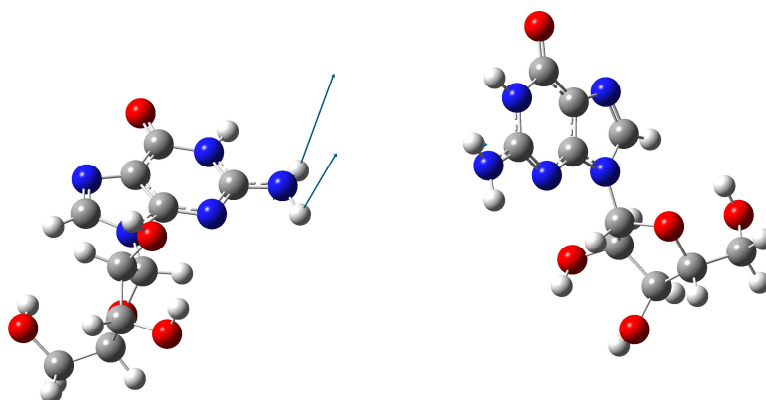

9.5 THz (Guanosine-dimer-water)

**Figure S2.** The vibrational modes corresponding to the main characteristic peaks of Guanosine-dimer-2H<sub>2</sub>O, Guanosine-dimer and Guanosine-dimer-water.
